# Supplementary material
Source: publisher figshare collection journal article supplement (https://acs.figshare.com/ndownloader/files/3796435)
Supplement: Supplementary file 1 [file 3796435]

# Supporting Information

## Rare Earth Core/Shell Nanobarcodes for Multiplexed Trace Biodetection\*\*

Lei Chen,<sup>†</sup> Xiaomin Li<sup>†</sup>, Dengke Shen,<sup>†‡</sup> Lei Zhou,<sup>†</sup> Dan Zhu,<sup>§</sup> Chunhai Fan,<sup>§</sup> and Fan Zhang<sup>†\*</sup>

<sup>†</sup>Department of Chemistry, *iChEm*(Collaborative Innovation Center of Chemistry for Energy Materials), State Key Laboratory of Molecular Engineering of Polymers, Fudan University, Shanghai 200433, P. R. China.

<sup>§</sup>Laboratory of Physical Biology, Shanghai Institute of Applied Physics, Chinese Academy of Sciences, Shanghai 201800, China

<sup>‡</sup>Key Laboratory of Materials Physics, Centre for Environmental and Energy Nanomaterials, Anhui Key Laboratory of Nanomaterials and Nanotechnology, Institute of Solid State Physics, Hefei Institutes of Physical Science, Chinese Academy of Sciences, Hefei 230031, China.

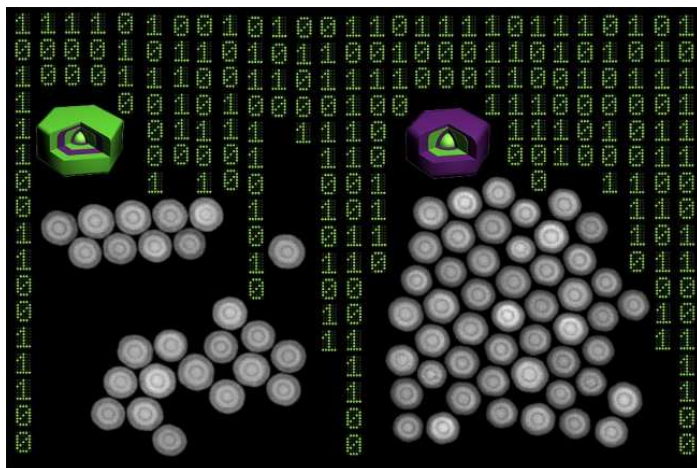

**Table S1 : DNA sequences**

| <b>Number</b> | <b>DNA name</b>                      | <b>Sequences (5'-3')</b>                                   |
|---------------|--------------------------------------|------------------------------------------------------------|
| 1             | Capture DNA <sub>1</sub>             | GTA CCA CTA CGA GAC ACT GCC TGA ACT<br>GTA                 |
| 2             | Capture DNA <sub>2</sub>             | CCT ATC GAC CAT GCT CCA GCG AGA AAA<br>TCT                 |
| 3             | Report DNA <sub>1</sub>              | TAA CAA CGA TCC CTC TTTT AAAAA<br>AAAAA AAAAA AAAAA        |
| 4             | Report DNA <sub>2</sub>              | TGT AAA GCT AGC TAT TTTT AAAAA<br>AAAAA AAAAA AAAAA        |
| 5             | Target DNA <sub>1</sub>              | GAG GGA TCG TTG TTA TAC AGT TCA GGC<br>AGT GTC TCG TAG TGG |
| 6             | Target DNA <sub>2</sub>              | ATA GCT AGC TTT ACA AGA TTT TCT CGC<br>TGG AGC ATG GTC GAT |
| 7             | Noncomplementary<br>DNA <sub>1</sub> | ATA GCT AGC TTT ACA AGA TTT TCT CGC<br>TGG AGC ATG GTC GAT |
| 8             | Noncomplementary<br>DNA <sub>2</sub> | GAG GGA TCG TTG TTA TAC AGT TCA GGC<br>AGT GTC TCG TAG TGG |

**Table S2. Calculated Number of Available Striping Patterns for a Given Number of Metals and Equal Length Stripes<sup>a</sup>**

<sup>a</sup>The number of combinations available where M is the number of distinct materials, n is the number of stripes, and the rod is inherently asymmetric is  $M^n$ .

| No. of stripes (n) | No. of matrixes (M) |       |
|--------------------|---------------------|-------|
|                    | 2                   | 3     |
| 1                  | 2                   | 3     |
| 2                  | 4                   | 9     |
| 3                  | 8                   | 27    |
| 4                  | 16                  | 81    |
| 5                  | 32                  | 243   |
| 6                  | 64                  | 729   |
| 7                  | 128                 | 2187  |
| 8                  | 256                 | 6561  |
| 9                  | 512                 | 13122 |
| 10                 | 1024                | 26244 |

**Table S3. Standard atomic spacings for different kinds of NaLnF<sub>4</sub> with their respective *hkl* indexes from PCPDFWIN database, and the lattice mismatch data between the NaLnF<sub>4</sub> materials along different directions.**

| Hexagonal phase                        |       |       |       |       |       |
|----------------------------------------|-------|-------|-------|-------|-------|
| <i>hkl</i>                             | 100   | 110   | 101   | 111   | 201   |
| NaGdF <sub>4</sub>                     | 5.210 | 3.010 | 2.976 | 2.314 | 2.115 |
| NaYbF <sub>4</sub>                     | 5.130 | 2.960 | 2.870 | 2.252 | 2.063 |
| NaYF <sub>4</sub>                      | 5.170 | 2.980 | 2.900 | 2.270 | 2.080 |
| Mismatch                               |       |       |       |       |       |
| NaGdF <sub>4</sub> -NaYbF <sub>4</sub> | 1.54% | 1.66% | 3.56% | 2.68% | 2.46% |
| NaGdF <sub>4</sub> - NaYF <sub>4</sub> | 0.77% | 1.00% | 2.55% | 1.90% | 1.65% |

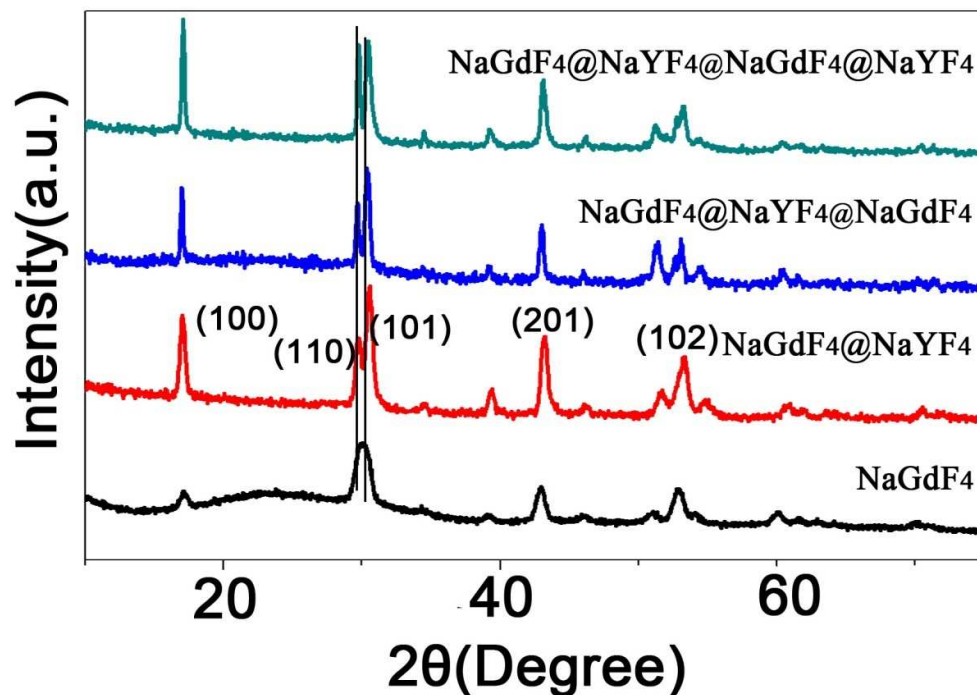

**Figure S1.** XRD patterns of the NaGdF<sub>4</sub> core (black line), NaGdF<sub>4</sub>/NaYF<sub>4</sub> (C/S1) (red line), NaGdF<sub>4</sub>/NaYF<sub>4</sub>/NaGdF<sub>4</sub>(C/S1/S2) (blue line) and NaGdF<sub>4</sub>/NaYF<sub>4</sub>/NaGdF<sub>4</sub>/NaYF<sub>4</sub> (C/S1/S2/S3) NBs (green line). It is demonstrated that the crystal structures of the obtained core/shell NPs are all consistent with the structure of the core NPs. The XRD diffraction peaks narrow gradually with the growth of different layer shells, indicating that the crystalline domain size increases for the core/shell NPs. In addition, small shift of the diffraction peaks can also be detected because of the small lattice mismatch ( $\sim 3.8\%$ ) between  $\beta$ -NaGdF<sub>4</sub> and  $\beta$ -NaYbF<sub>4</sub>. These results further demonstrate the epitaxial seeded growth approach.

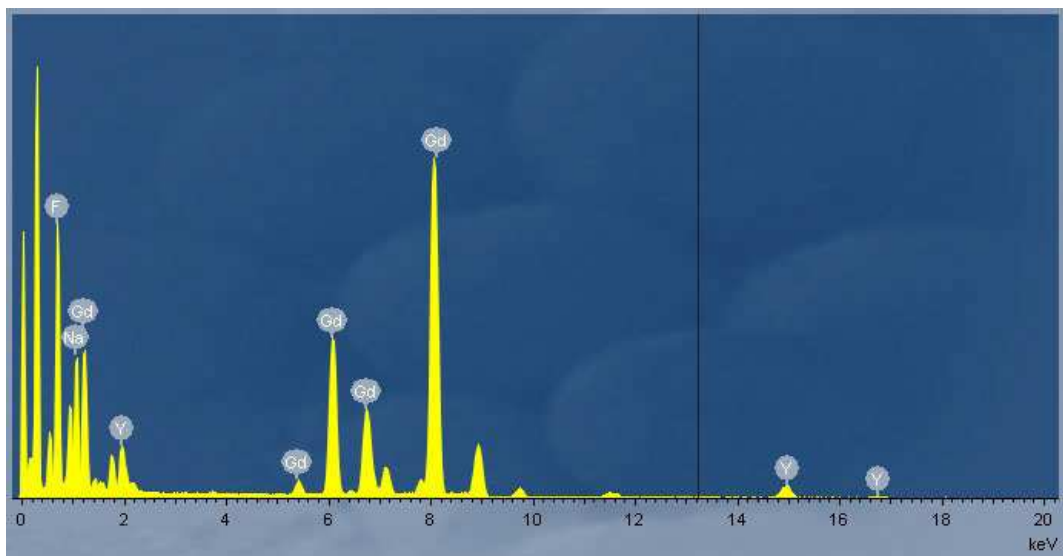

**FigureS2.** EDAX spectra of the  $\text{NaGdF}_4/\text{NaYF}_4/\text{NaGdF}_4/\text{NaYF}_4$  (C/S1/S2/S3) NBs.

The existence of Na, F, Gd, Yb, Y can be confirmed, further demonstrating the multilayer core/shell nanostructure with different components.

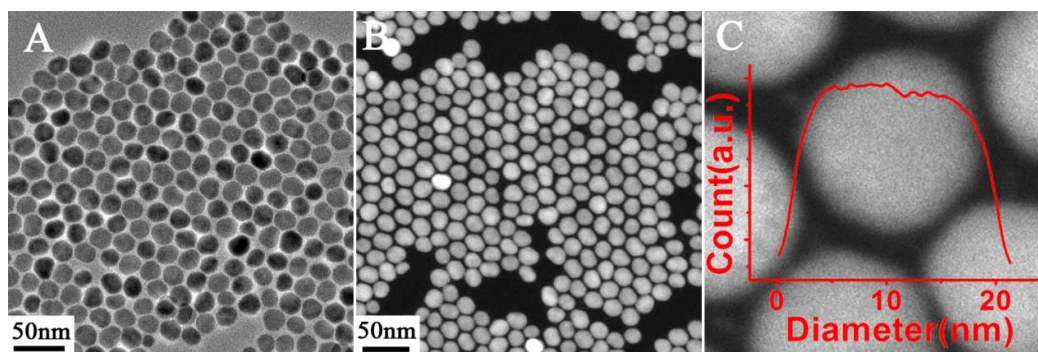

**Figure S3.** TEM (A) and HAADF-STEM (B, C) images of  $\text{NaGdF}_4/\text{NaYbF}_4$  core/shell nanoparticles.

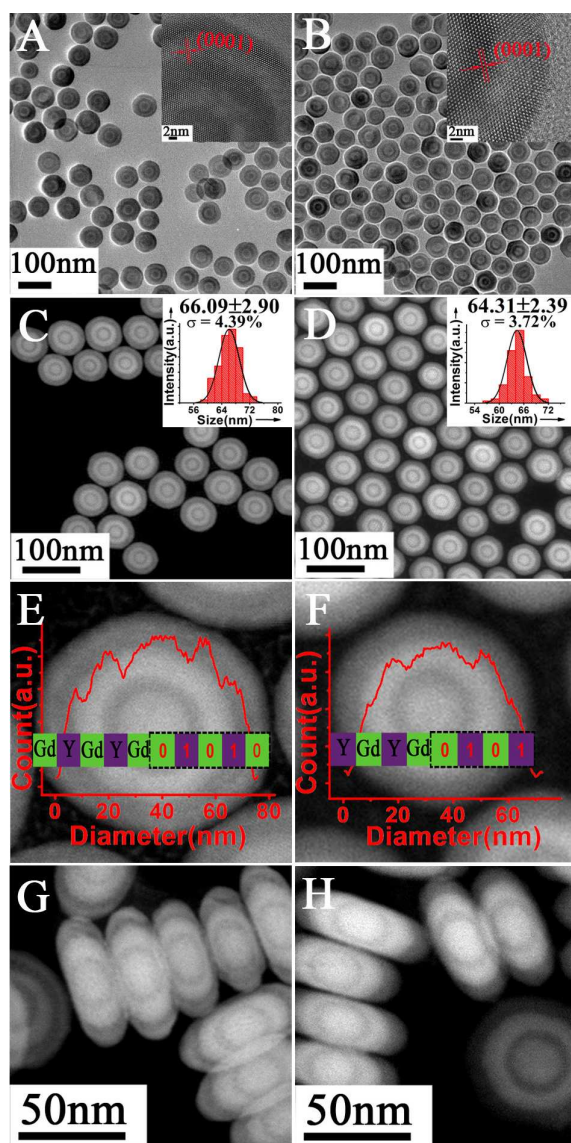

**Figure S4.** TEM (A,B) and HAADF-STEM (C-H) images of NaGdF<sub>4</sub>/NaYF<sub>4</sub>/NaGdF<sub>4</sub>/NaYF<sub>4</sub>/NaGdF<sub>4</sub> (NBs<sub>01010</sub>) five layer (A, C, E) and NaGdF<sub>4</sub>/NaYF<sub>4</sub>/NaGdF<sub>4</sub>/NaYF<sub>4</sub> (NBs<sub>0101</sub>) four layer (B, D, F) NBs and DNA conjugated NBs<sub>01010</sub>(G) and NBs<sub>0101</sub>(H) NBs in water. It's worth noting that the discernible contrast not only can be confirmed from the [0001] direction (Figure E, F) but also the  $[10\bar{1}0]$  direction (Figure G, H).



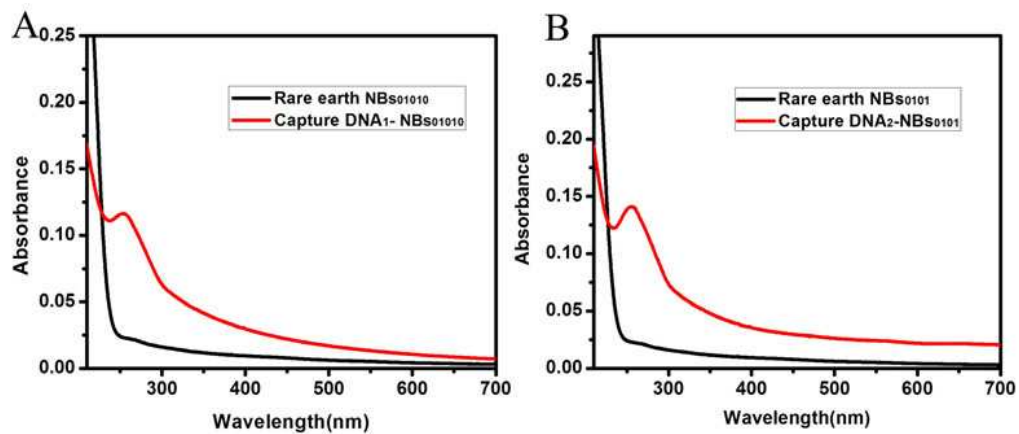

**Figure S5.** The UV/Vis spectrum of A) the NBs<sub>01010</sub> in chloroform and capture DNA<sub>1</sub>-NBs<sub>01010</sub> in water; B) the NBs<sub>0101</sub> in chloroform and capture DNA<sub>2</sub>-NBs<sub>0101</sub> in water.

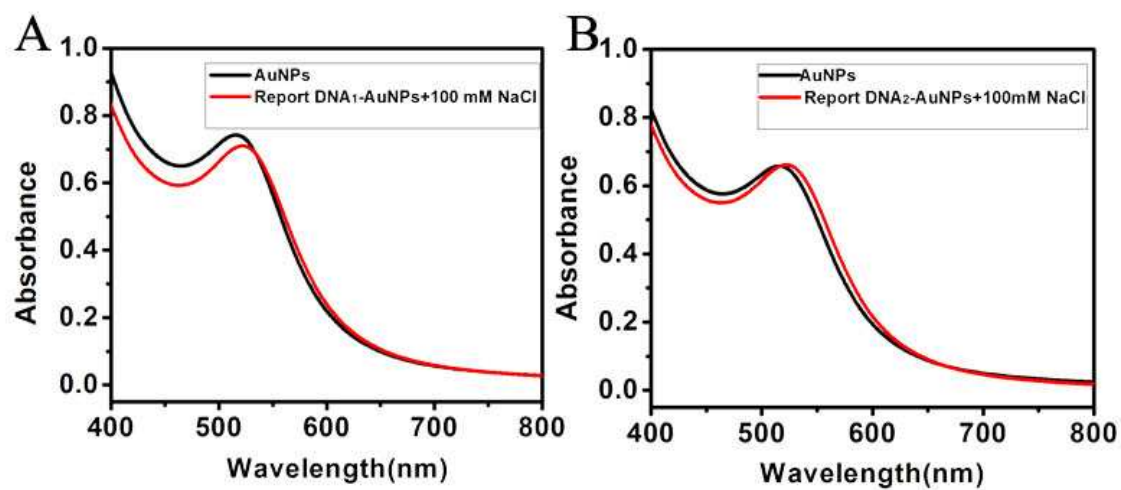

**Figure S6.** UV-vis spectra of A) AuNPs and report DNA<sub>1</sub>-AuNPs sample in solutions with 100 mM NaCl and B) AuNPs and report DNA<sub>2</sub>-AuNPs sample in solutions with 100 mM NaCl.

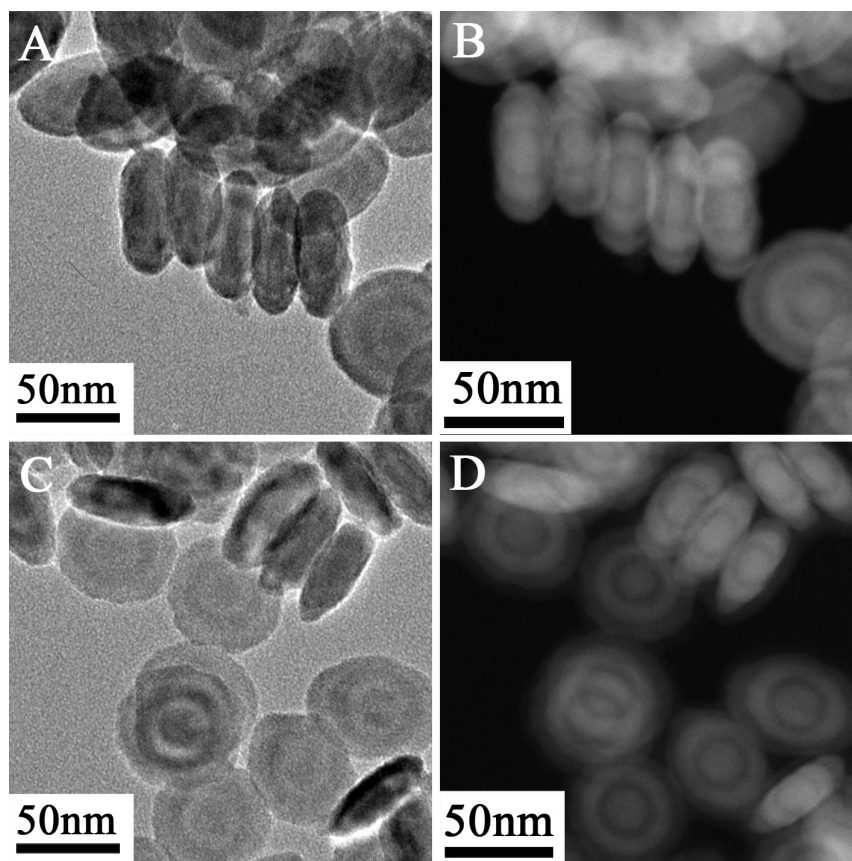

**Figure S7.** TEM (A, C) and HAADF-STEM (B, D) images of the  $\text{NaGdF}_4/\text{NaYF}_4/\text{NaGdF}_4/\text{NaYF}_4/\text{NaGdF}_4$  ( $\text{NBs}_{01010}$ ) with addition of noncomplementary target  $\text{DNA}_2$  (A, B) and  $\text{NaGdF}_4/\text{NaYF}_4/\text{NaGdF}_4/\text{NaYF}_4$  ( $\text{NBs}_{0101}$ ) with addition of noncomplementary target  $\text{DNA}_1$  (C, D).

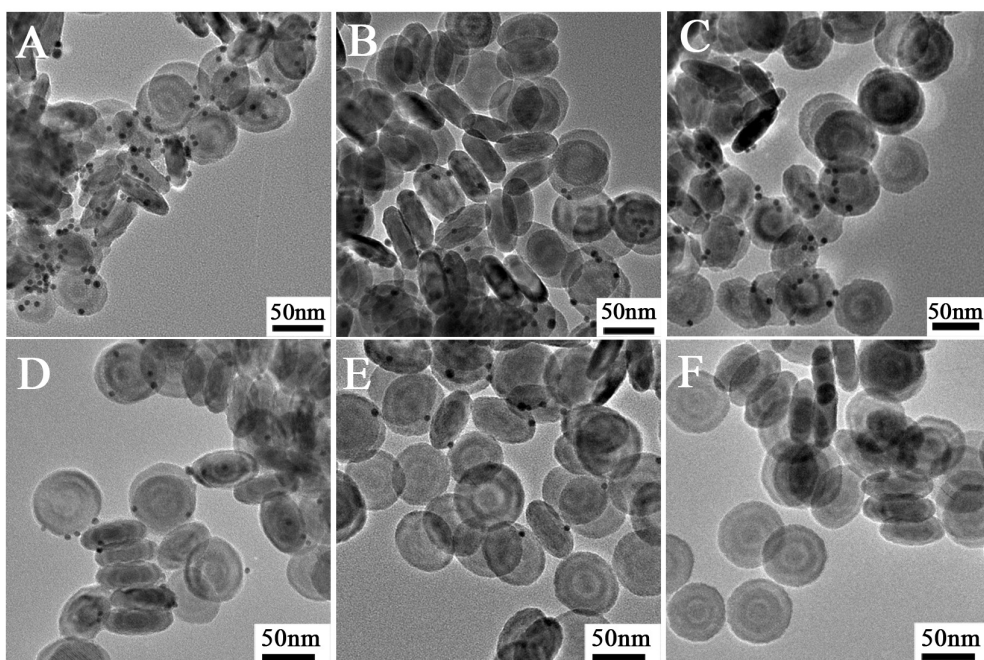

**Figure S8.** TEM images of the  $\text{NaGdF}_4/\text{NaYF}_4/\text{NaGdF}_4/\text{NaYF}_4$  ( $\text{NBs}_{0101}$ ) and  $\text{NaGdF}_4/\text{NaYF}_4/\text{NaGdF}_4/\text{NaYF}_4/\text{NaGdF}_4$  ( $\text{NBs}_{01010}$ ) with (A) both target  $\text{DNA}_1$  and target  $\text{DNA}_2$ ; (B) only target  $\text{DNA}_1$ ; (C) only target  $\text{DNA}_2$ . TEM images of the five layer  $\text{NBs}_{01010}$  for DNA trace detection at target concentration of (D) 60 pM  $\text{DNA}_2$ , (E) 6 pM  $\text{DNA}_2$  and (F) no target DNA.
